# Supplementary material
Source: Springer Nature journal article supplement (https://www.springermedizin.de/resource/supplementary/12967_2010_695_MOESM1_ESM.pdf/9577298)

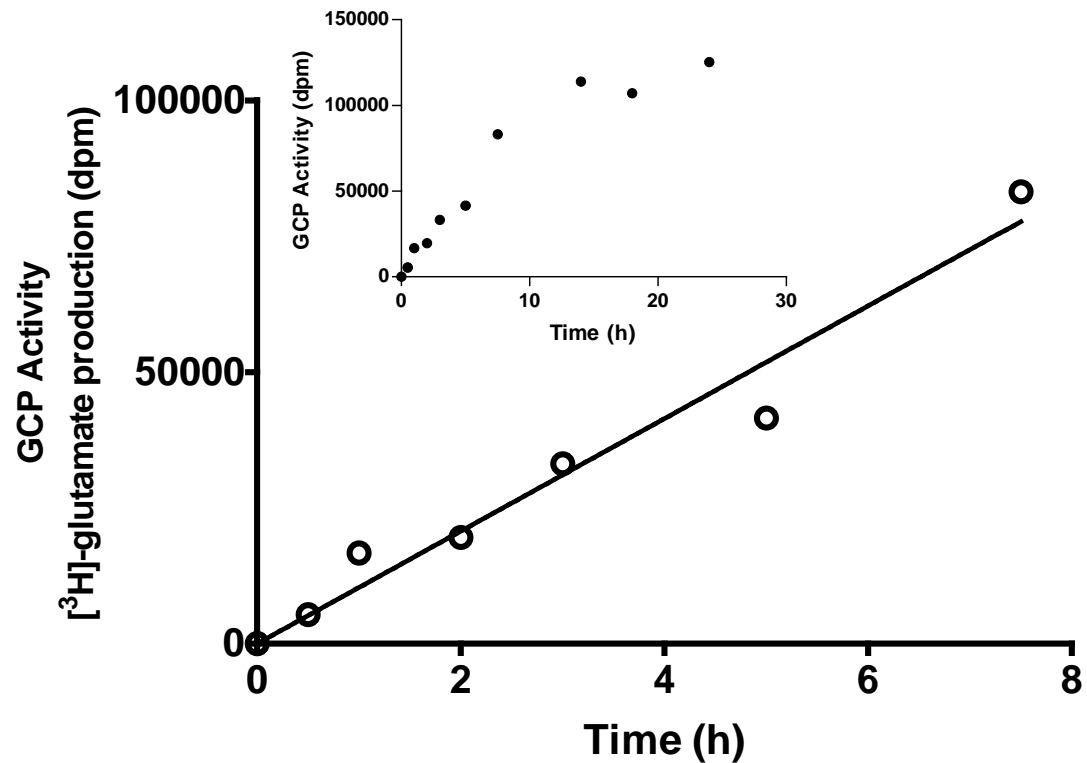

Supplement: MOESM1 [file 9577298]
